# Supplementary material for: Stabilization of a non-aqueous self-double-emulsifying delivery system of rutin by fat crystals and nonionic surfactants: preparation and bioavailability study
Source: Royal Society of Chemistry journal article supplement (doi:10.1039/c7fo00439g), 2017-01-01
Supplement: c7fo00439g1.pdf [file c7fo00439g1.pdf]

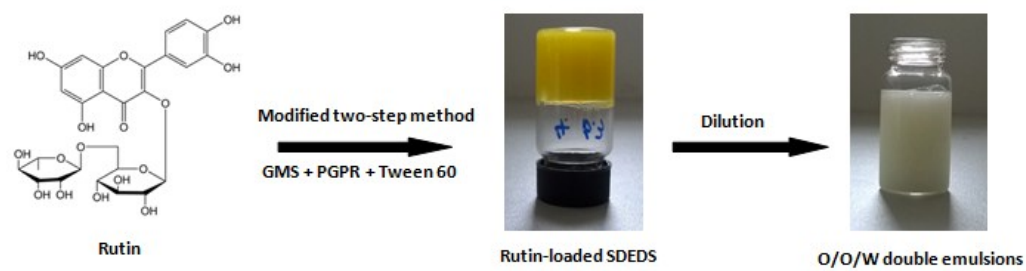

**Electronic supplementary material 1.** The physical appearance of rutin-loaded SDEDS and the resultant O/O/W double emulsions after dilution.

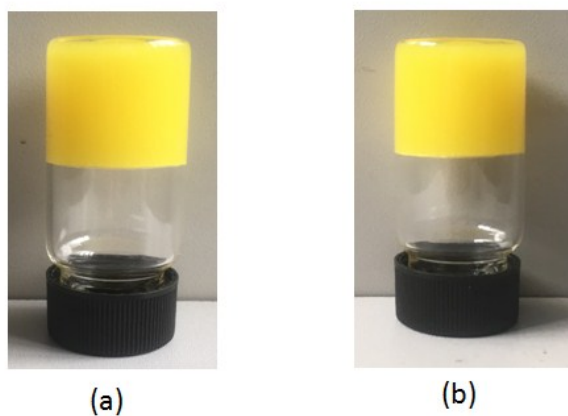

**Electronic supplementary material 2.** The appearance images of the optimized rutin-loaded SEDDS immediately after its formation **(a)** and after 4 weeks storage **(b)** at 4 °C.

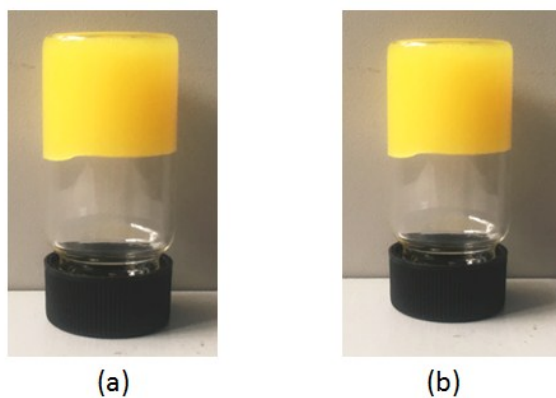

**Electronic supplementary material 3.** The appearance images of the optimized rutin-loaded SEDDS immediately after its formation **(a)** and after 4 weeks storage **(b)** at 25 °C.

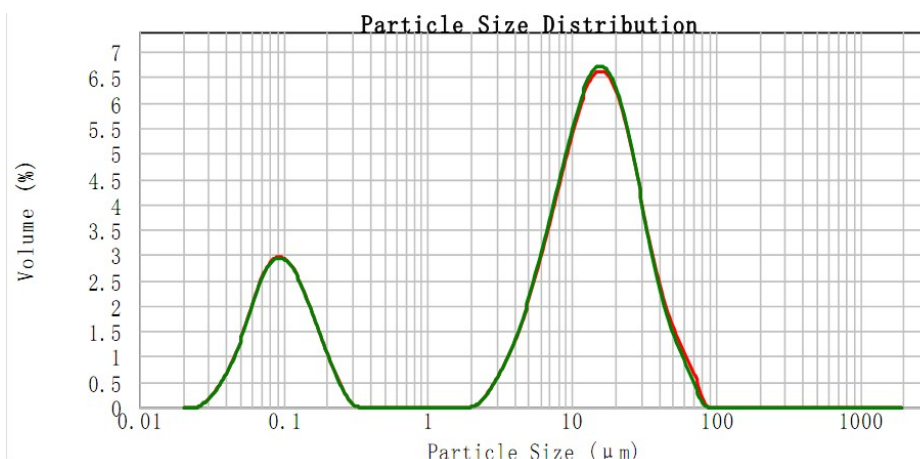

**Electronic supplementary material 4.** The particle size distribution of the optimized rutin-loaded SDEDS immediately after its formation (**green line**) and after 4 weeks storage (**red line**) at 4 °C.

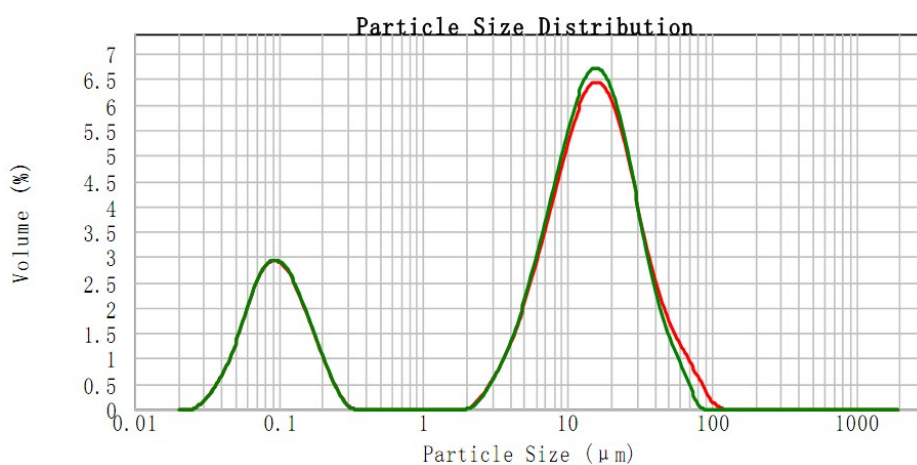

**Electronic supplementary material 5.** The particle size distribution of the optimized rutin-loaded SDEDS immediately after its formation (**green line**) and after 4 weeks storage (**red line**) at 25 °C.
